# Supplementary material for: High Performance Complementary Circuits Based on p-SnO and n-IGZO Thin-Film Transistors
Source: MDPI journal article supplement (doi:10.3390/ma10030319), 2017-03-21
Supplement: s1 [file s1]

# Supplementary Materials: High Performance Complementary Circuits Based on p-SnO and n-IGZO Thin-Film Transistors

Jiawei Zhang, Jia Yang, Yunpeng Li, Joshua Wilson, Xiaochen Ma, Qian Xin and Aimin Song

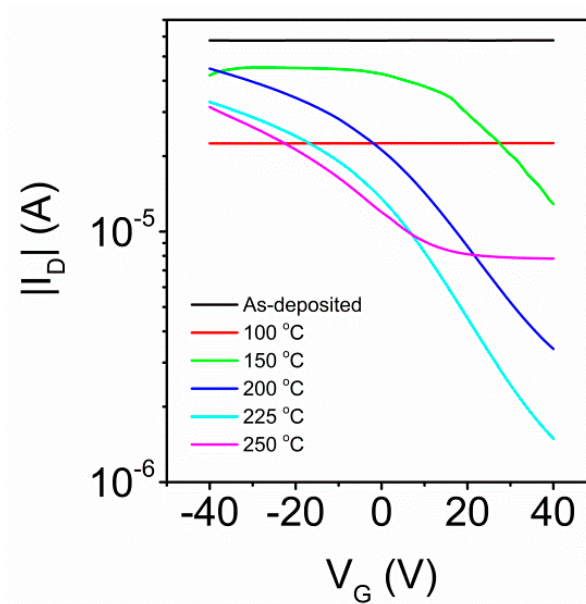

**Figure S1.** Transfer characteristics of the SnO TFTs annealed at different temperatures at  $V_D = -1$  V.

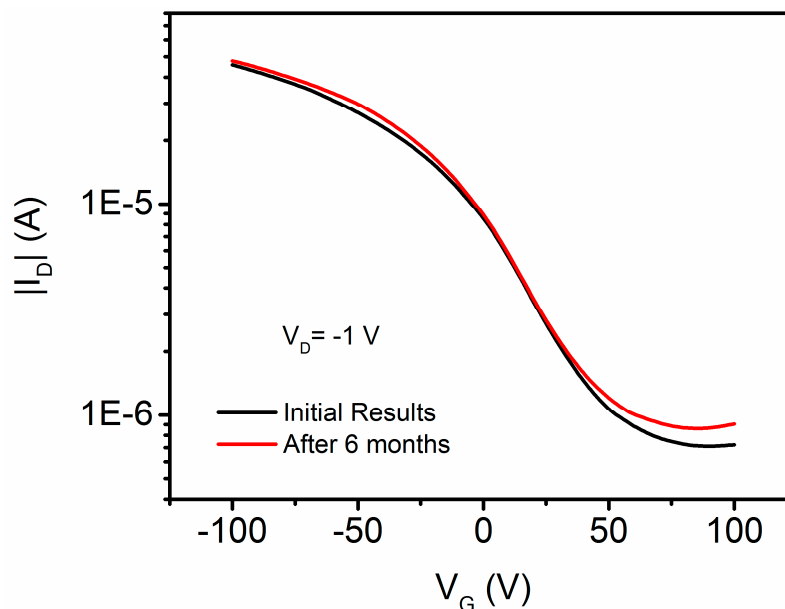

**Figure S2.** Transfer characteristics of the SnO TFT annealed at 225 °C measured immediately after the fabrication and after 6 months in air, respectively.

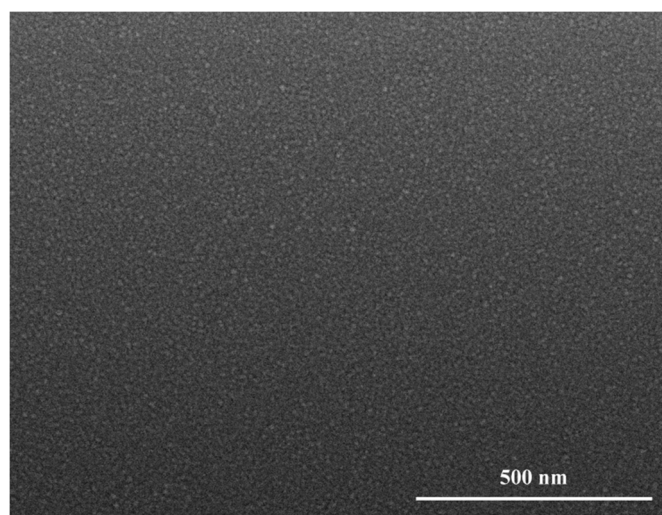

Figure S3. SEM image of the as-deposited SnO film.

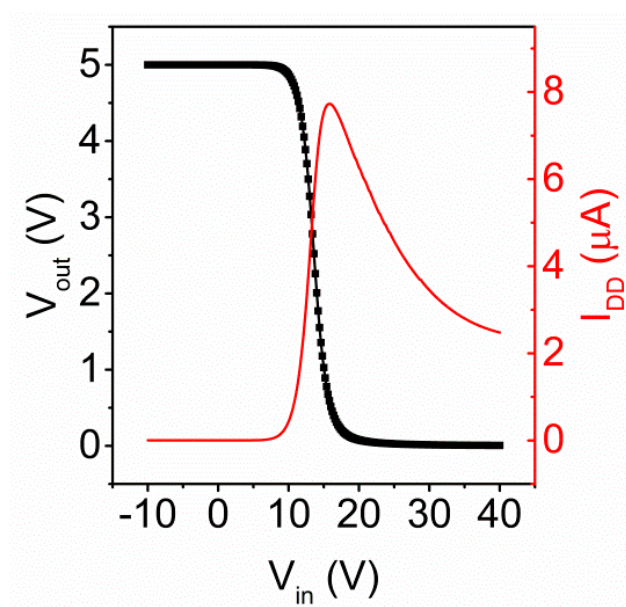

Figure S4. Output voltage and the leakage current of the inverter with  $V_{DD} = 5$  V.
